# Supplementary material
Source: ML conference proceedings conference paper supplement (https://openreview.net/forum?id=3sRR2u72oQ)
Supplement: supplementary_material [file attachment]

## The Machine Learning Reproducibility Checklist (Version 1.2, Mar.27 2019)

For all **models** and **algorithms** presented, check if you include:

- ☒ A clear description of the mathematical setting, algorithm, and/or model.
- ☐ An analysis of the complexity (time, space, sample size) of any algorithm.
- ☒ A link to a downloadable source code, with specification of all dependencies, including external libraries.

For any **theoretical claim**, check if you include:

- ☐ A statement of the result.
- ☐ A clear explanation of any assumptions.
- ☐ A complete proof of the claim.

For all **figures** and **tables** that present empirical results, check if you include:

- ☒ A complete description of the data collection process, including sample size.
- ☒ A link to a downloadable version of the dataset or simulation environment.
- ☒ An explanation of any data that were excluded, description of any pre-processing step.
- ☒ An explanation of how samples were allocated for training / validation / testing.
- ☒ The range of hyper-parameters considered, method to select the best hyper-parameter configuration, and specification of all hyper-parameters used to generate results.
- ☒ The exact number of evaluation runs.
- ☒ A description of how experiments were run.
- ☒ A clear definition of the specific measure or statistics used to report results.
- ☐ Clearly defined error bars.
- ☒ A description of results with central tendency (e.g. mean) & variation (e.g. stddev).
- ☒ A description of the computing infrastructure used.

Reproduced from: [www.cs.mcgill.ca/~jpineau/ReproducibilityChecklist.pdf](http://www.cs.mcgill.ca/~jpineau/ReproducibilityChecklist.pdf)

**Figure 9:** The Machine Learning Reproducibility Checklist, version 1.2, used during the NeurIPS 2019 review process.
